# Supplementary material for: A simple hydrothermal route for the preparation of HgS nanoparticles and their photocatalytic activities
Source: Royal Society of Chemistry journal article supplement (doi:10.1039/c4ra00483c), 2014-01-01
Supplement: c4ra00483c1.pdf [file c4ra00483c1.pdf]

## Supporting information

### **A simple hydrothermal route for the preparation of HgS nanoparticles and their photocatalytic activities**

Rengaraj Selvaraj<sup>a\*</sup>, Kezhen Qi<sup>b</sup>, Salma M. Z. Al-Kindy<sup>a</sup>, Mika Sillanpää<sup>c</sup>, Younghun Kim<sup>d</sup>,

Cheuk-wai Tai<sup>e</sup>

<sup>a</sup> *Department of Chemistry, College of Science, Sultan Qaboos University, Muscat, Sultanate of Oman.*

<sup>b</sup> *College of Chemistry and Life Science, Shenyang Normal University, Shenyang, 110034, China.*

<sup>c</sup> *Laboratory of Green Chemistry, LUT Savo Sustainable Technologies, Lappeenranta University of Technology, Sammonkatu 12, FI-50130 Mikkeli, Finland.*

<sup>d</sup> *Department of Chemical Engineering, Kwangwoon University, Seoul 139-701, Korea.*

<sup>e</sup> *Department of Materials and Environmental Chemistry, Arrhenius Laboratory, Stockholm University, S-106 91 Stockholm, Sweden.*

Corresponding Author: Dr. Rengaraj Selvaraj

Address: *Department of Chemistry, College of Science, Sultan Qaboos University, Muscat, Sultanate of Oman.*

\*Corresponding author Tel: +968-2414 2436;

e-mail: [srengaraj1971@yahoo.com](mailto:srengaraj1971@yahoo.com)

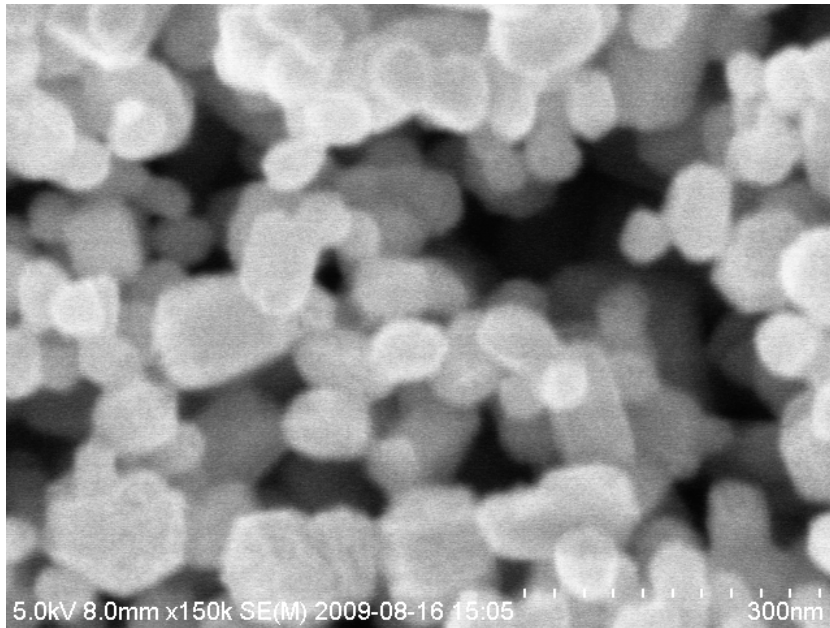

**Fig. S1.** SEM image of the as-prepared HgS products with the assistance of PEG-0.

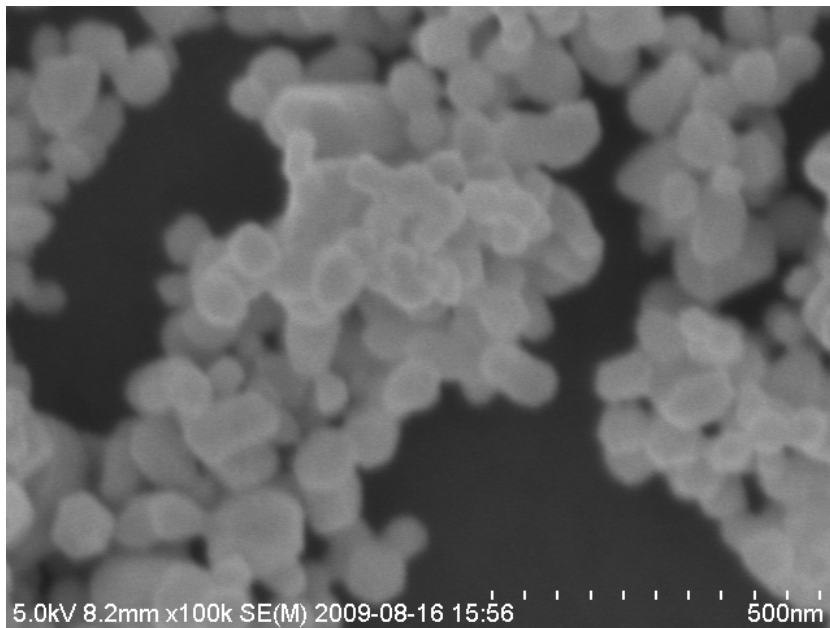

**Fig. S2.** SEM image of the as-prepared HgS products with the assistance of PEG-2000.

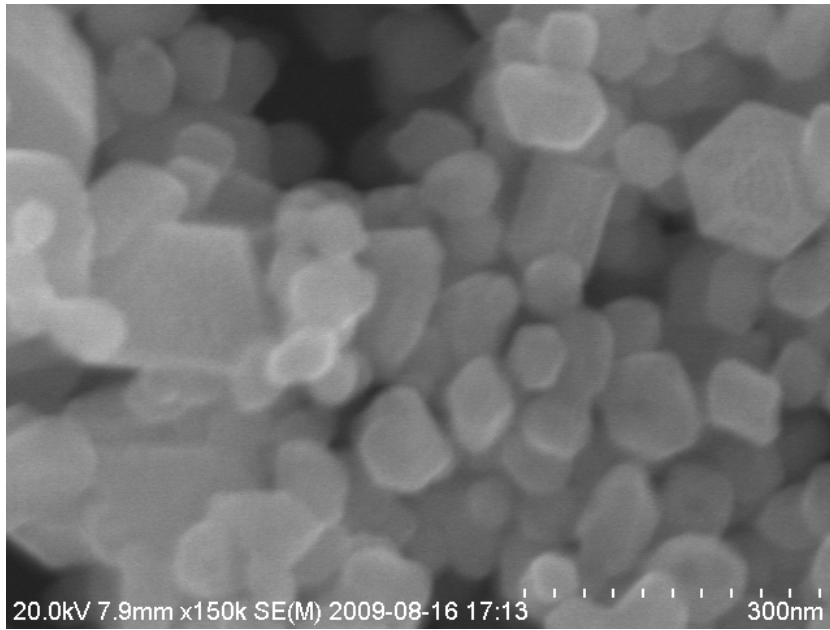

**Fig. S3.** SEM image of the as-prepared HgS products with the assistance of PEG-4000.

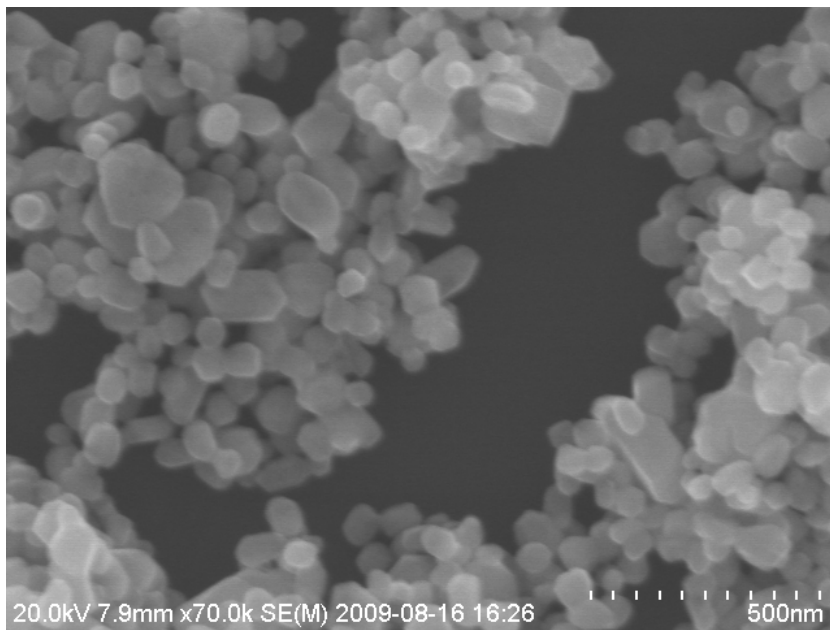

**Fig. S4.** SEM image of the as-prepared HgS products with the assistance of PEG-6000.
